# Supplementary material for: Retrieval of ice water path from the FY-3B MWHS polarimetric measurements based on deep neural network
Source: Copernicus journal article supplement (doi:10.5194/amt-2022-2), 2022-01-28
Supplement: Supplementary file [file amt-2022-2-AC2-supplement.pdf]

## Response to Reviewers

### Reviewer 2

We would like to sincerely thank the reviewer for his professional comments and helpful suggestions. We believe they help us to improve the manuscript significantly and give us many useful ideas to our work. We have revised the manuscript according to the reviewer's comments and answered the reviewer's question point by point below.

Reviewer comments are in italic blue and our responses in black, the manuscript changes are in red.

### Reply to general comments

*The paper develops the Neural Network for the FY/MWHS to retrieve global IWP parameters using the correlations between the CloudSat 2C-ICE IWP products and the MWHS BT measurements when collocations happen. Although the statistical NN method does not use any forward model calculations to involve physical radiative transfer processes, it provides a simple and quick way to obtain the global IWP coverage from the FY/MWHS observations. However, the entire methods including finding collocations, developing NN, and analyzing results have so many similarities to the paper in Holl et al., 2010; 2014, which raises concerns about the significance and novelty of this work. Further, major issues as summarized below exist in the developed methods. Due to these weaknesses, the manuscript is recommended to be rejected in the present form.*

Reply: Thanks for the comments. The idea of the manuscript is to use polarized microwave observations from the MWHS to retrieve ice water path because these observations have not been used for this purpose before. We agree the criticism and the manuscript has been revised and rewritten in response to reviewers' comments. The major changes in the revision are as follows:

(1) The collocation data set has been reanalyzed according to the suggestions from reviewer 1 and reviewer 2, the scatter plots were replaced by density plots; collocations in high latitudes were randomly removed to make the data set balance. (Sec. 2.2, Fig. 3-5)

(2) Most of the graphics have been revised.

(3) Network evaluation metrics were added, including FAR, POD, RMSE, MAPE, BIAS, and Pearson correlation coefficient. (Sec. 3)

(4) The networks have been re-trained using the new data set, and the classification network was redesigned using the focal loss function to reduce the effect of data imbalance. The artifacts over the Tibetan plateau have been reduced. (Sec. 4.1)

(5) Reanalysis of the new retrieval results, including the final configuration results. (Sec. 4.2)

(6) A case of tropical cyclone observed simultaneously by MWHS and CloudSat was added. (Sec. 4.3.1, Fig. 9-10)

(7) The annual mean IWP for 2015 was calculated and compared with the other three data sets. (Sec. 4.3.2, Fig. 11)

(8) Comparison of zonal means of IWP was added. (Sec. 4.3.2, Fig. 12)

## **Reply to specific comments**

### *Section 2.2, lines 133-144*

*The procedure of finding collations is one of the key steps in the entire study, but the descriptions shown in lines 133-144 in Sect 2.2 are very vague. For example, the MWHS footprint size should change with the scanning angles since the instrument has a cross-track scanning mode. How accurate is it to always approximate the MWHS footprint using a constant circular pixel? How do you address the spatial response function inside each MWHS footprint? Also, when the MWHS scanning angle is too large, its field of view is likely to be different to that of the nadir-looking CPR even though the two sensors have similar geolocations, and readers might wonder how representative the collations are in such situations. The sampling errors due to insufficient CPR pixels in each MWHS measurement are mentioned, but it is still not clear how significant the errors are and what the authors did to minimize the negative effects.*

Reply: Thanks for the comment.

(1) Using a constant circular pixel to approximate the MWHS footprint has no impact on collocation. The collocations at edge angles are few, and although the MWHS pixel becomes larger with scanning, the CPR is limited. The geographic distance of 7.5 km is used as a threshold to obtain as many as possible collocations with sample representativeness. If the collocation window continues to increase or decrease, the distribution of collocations will be limited to a specific spatial and time range.

(2) The spatial response function is not known, and thus we average the CPR IWP in the MWHS pixel to improve representativeness.

(3) The field of view of MWHS and CPR is different, and when the scan angle is large, the atmospheric path will be much longer than the nadir observation. However, the effect is not significant for ice clouds that typically exist in the upper troposphere. We have added the scan angle in the auxiliary parameters of the neural network, which is similar to common practice in data assimilation.

(4) There is no accurate method to evaluate the sampling error because we do not know what is happening in the MWHS pixel other than CPR pixels, and there is no other reference. This is a limitation of the collocation method. To reduce this effect, we chose collocations with the number of CPR pixels larger than 10 and the coefficient of variation less than 0.6, i.e., when a scene contains more than 10 CPR pixels within a scene and the IWP variation is relatively small, the scene is considered representative.

The changes are as follows:

“Since the collocation error cannot be estimated, the criteria discussed in Holl et al. (2010) is applied to reduce the sampling effect of collocations. In this study, an MWHS pixel with more than 10 pixels of 2C-ICE and less than 0.6 coefficients of variation were selected for subsequent processing. However, in the case of highly inhomogeneous clouds existing outside the CloudSat field of view, larger uncertainty for the IWP within MWHS pixels cannot be eliminated. After the reduction of inhomogeneous collocations, 665519 collocations were retained.” (Sec. 2.2)

### Section 2.2, figures 1-3

*The random IWP cases in the collocation database essentially represent our prior knowledge about the ice cloud distribution. Considering that the topic of this paper is to address the global water path distribution, the collation database is expected to sample the global IWP coverage without biases. The results in fig.3, however, show that the latitudinal distribution of the dataset is highly ununiform. This suggests improper weights are given to the random database cases, and therefore systematic biases are introduced during NN retrievals. How to make the collocation database cases to distribute according to our prior knowledge needs to be addressed.*

Reply: Thanks for the comment. The data set has been optimized for the latitudinal distribution. We also use the "focal loss" function to resolve the data situation with more sunny days and fewer cloudy days. The changes are as follows:

(Sec. 2.2) “Due to the high number of collocations near the poles, 121500 observations at high latitude were randomly excluded to obtain a balanced data set. For IWP retrieval, collocations should be classified into two bins (clear-sky scene and cloudy scene) according to a specific IWP threshold. A threshold of  $IWP > 100 \text{ g m}^{-2}$  is preliminarily selected to classify cloudy scenes. Thus, 81490 collocations are recognized to be cloudy scenes and 462529 collocations are clear sky scenes in this data set.”

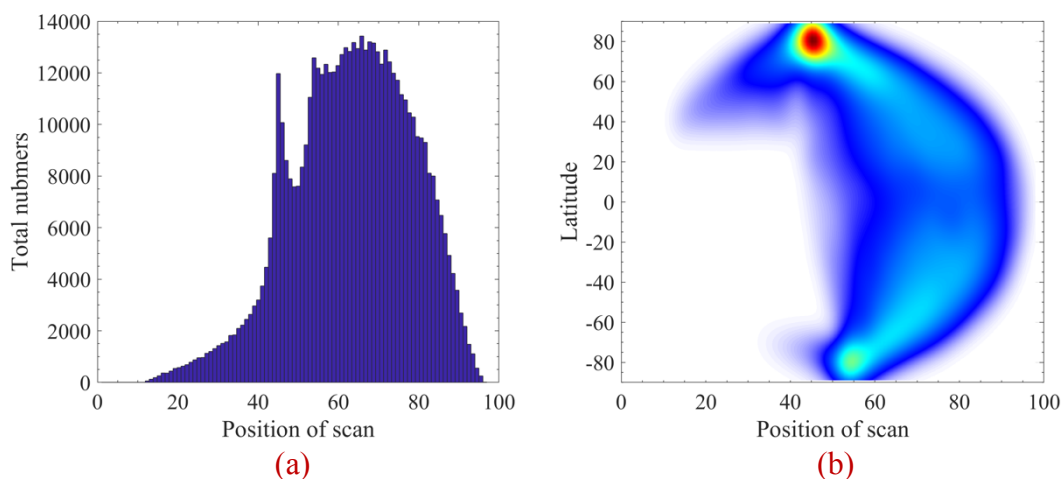

Figure 2. Statistical information of scan angle and latitude of MWHS observations in the collocation data set.

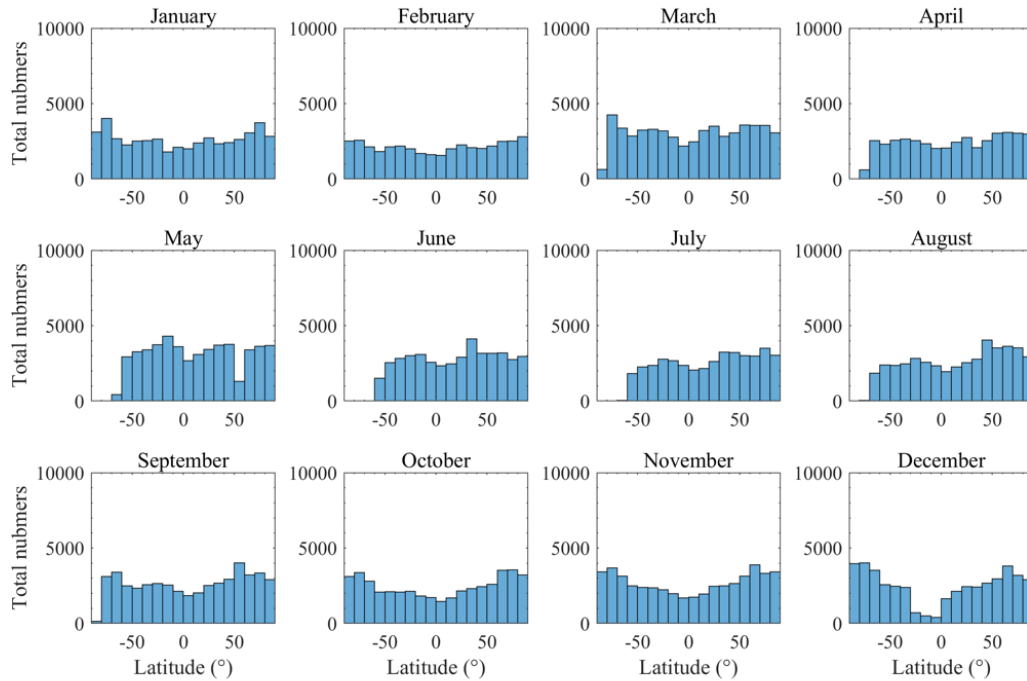

Figure 3. MWHS measurements distribution of time and latitude in the collocation data set.”

#### Section 2.2, figures 4 and 5

*The biggest problem of this study is the dramatic lack of validation and evaluation of the essential collocation database. Since there are so many error sources in collocating, adequate work on validating the dataset and evaluating the mismatch errors is necessary. The only results serving such purposes are given in figures 4 and 5, but the results are very confusing. The figures show that the BT observations spread over identical ranges no matter the ice clouds exist or not, at least in the way the authors show. How could you retrieve ice cloud parameters if the BT observations do not respond to the ice cloud change at all? Besides, I suspect that the collocation database should have many physically unreasonable cases due to various error sources, right? If so, the method to filter out the meaningless cases needs to be illustrated. Also, the effects of various error sources on the database and the retrieval accuracies need to be thoroughly analyzed. Overall, solid evidence must be provided to assure the critical collocation database is robust.*

Reply: Thanks for the comment. We agree with your criticism.

(1) The scatter plot here is misleading, we have re-analysed the edge observations scan angles from ( $\pm 40.15^\circ$  to  $\pm 53.35^\circ$ ) and plotted the density as suggested by reviewer 1 (Fig. 4 and 5). It can be seen from the plot that there is a clear TB response to the ice clouds. Another problem is the appearance of low TB in clear sky in some cases. It is mainly caused by low atmospheric temperature, occurring at high altitudes such as the Tibetan Plateau or in regions with atmospheric temperature anomalies. Thus, latitude is important auxiliary information in training.

(2) For physically unreasonable, there is a possibility that ice clouds exist outside the FOV of CloudSat (only one-tenth of the MWHS pixel) but are still in the FOV of MWHS, which can also lead to low TB in clear sky conditions. Unfortunately, we don't have access to this information.

(3) Current studies based on multiple sensors usually use the similar collocation method, such as the CloudSat-GPM coincidence dataset 2B-CSATGPM that is widely used in cloud and precipitation studies

(Turk, 2017; Turk et al., 2021). The accuracy of collocation is still a challenging problem, especially for the joint use of active radar and passive radiometers.

This issue is also mentioned in Gong et al., 2014 and Gong et al., 2020:

“Ice cloud misclassification is an unavoidable issue for any cloud retrieval technique. Cloud misclassification of this retrieval algorithm is partly induced by the beam-filling effect and mismatch of CloudSat and MHS footprints spatially and temporarily.” (Gong et al., 2014)

“On the other hand, since match-up is defined to happen whenever the CPR beam intercepts with the DPR beam at any altitude and at any DPR view angle, the line-of-sight volume is quite different when DPR is at an off-nadir view angle, and this problem is even more severe for GMI which always views at a slant angle. Even though a cosine function is multiplied to slightly mitigate this issue (Turk, 2017), 3D cloud inhomogeneity and beam-filling effects are again the culprit of uncertainty that is hard to justify.” “In our case, footprint size and line-of-sight mismatch are likely the largest sources of bias/uncertainty due to imperfect match.” (Gong et al., 2020)

However, just as reviewer 1 said: “Although there are uncertainties related to the co-locations of the CloudSat and MWHS observations, these uncertainties are represented in the training data.” Although the processing of neural networks is a black box, it is able to identify these features.

In addition, since there are no accurate in-suit measurements of the ice clouds, our study aims to explore the hidden ice cloud information in the previously neglected microwave radiometer measurements, which has implications for the development and selection of future satellite missions. The results of the comparison between annual and latitudinal means from MWHS, MODIS, 2C-ICE and ERA5 show that the data set is reliable.

## **Reference:**

Turk, F. J. CloudSat-GPM coincidence dataset, Algorithm and Theoretical Basis Document, available at: [https://pps.gsfc.nasa.gov/Documents/CSATGPM\\_COIN\\_ATBD.pdf](https://pps.gsfc.nasa.gov/Documents/CSATGPM_COIN_ATBD.pdf), 2017.

Turk, F. J., Ringerud, S. E., Camplani, A, et al. Applications of a CloudSat-TRMM and CloudSat-GPM Satellite Coincidence Dataset. *Remote Sensing.*, 13(12), 2264, <https://doi.org/10.3390/rs13122264>, 2021.

Gong, J., Wu, D. L. CloudSat-constrained cloud ice water path and cloud top height retrievals from MHS 157 and 183.3 GHz radiances, *Atmos. Meas. Tech.*, 7(6), 1873-1890, <https://doi.org/10.5194/amt-7-1873-2014>, 2014.

Gong, J., Zeng, X., Wu, D. L., et al. Linkage among ice crystal microphysics, mesoscale dynamics, and cloud and precipitation structures revealed by collocated microwave radiometer and multifrequency radar observations, *Atmos. Chem. Phys.*, 20, 12633–12653, <https://doi.org/10.5194/acp-20-12633-2020>, 2020.

The changes are as follows:

(Sec. 2.2) “The density plots of the PD and TB at 150 GHz (clear-sky and cloudy scene) and the corresponding IWP from 2C-ICE over the ocean and land are depicted in Fig. 4 and 5. Scan angles from  $\pm 40.15^\circ$  to  $\pm 53.35^\circ$  are selected to compare the results with observations from conical scanners. In the cloudy case, the TBs are distributed between 150 K and 290 K, with the largest PD occurring at 230 K (corresponding to  $IWP > 1000 \text{ g m}^{-2}$ ). This is similar to the result of Gong et al (2017, 2020). However, due to the cross-track scanning mode, the PD of MWHS is much lower than conical scanners. The lowest TB generally appears in the center of deep convection clouds, and the PD is small due to the randomly oriented ice particles; the largest PD due to the horizontally oriented particles generally appears in the warmer ice clouds. From Fig. 4, it can be seen that the lower the TB, the larger IWP, but the TB is also influenced by the local atmospheric temperature. Comparing Fig. 4 and Fig. 5, the TB of the clear sky is generally above 240 K. The PD from the ocean surface is relatively large, while the PD from land is small.

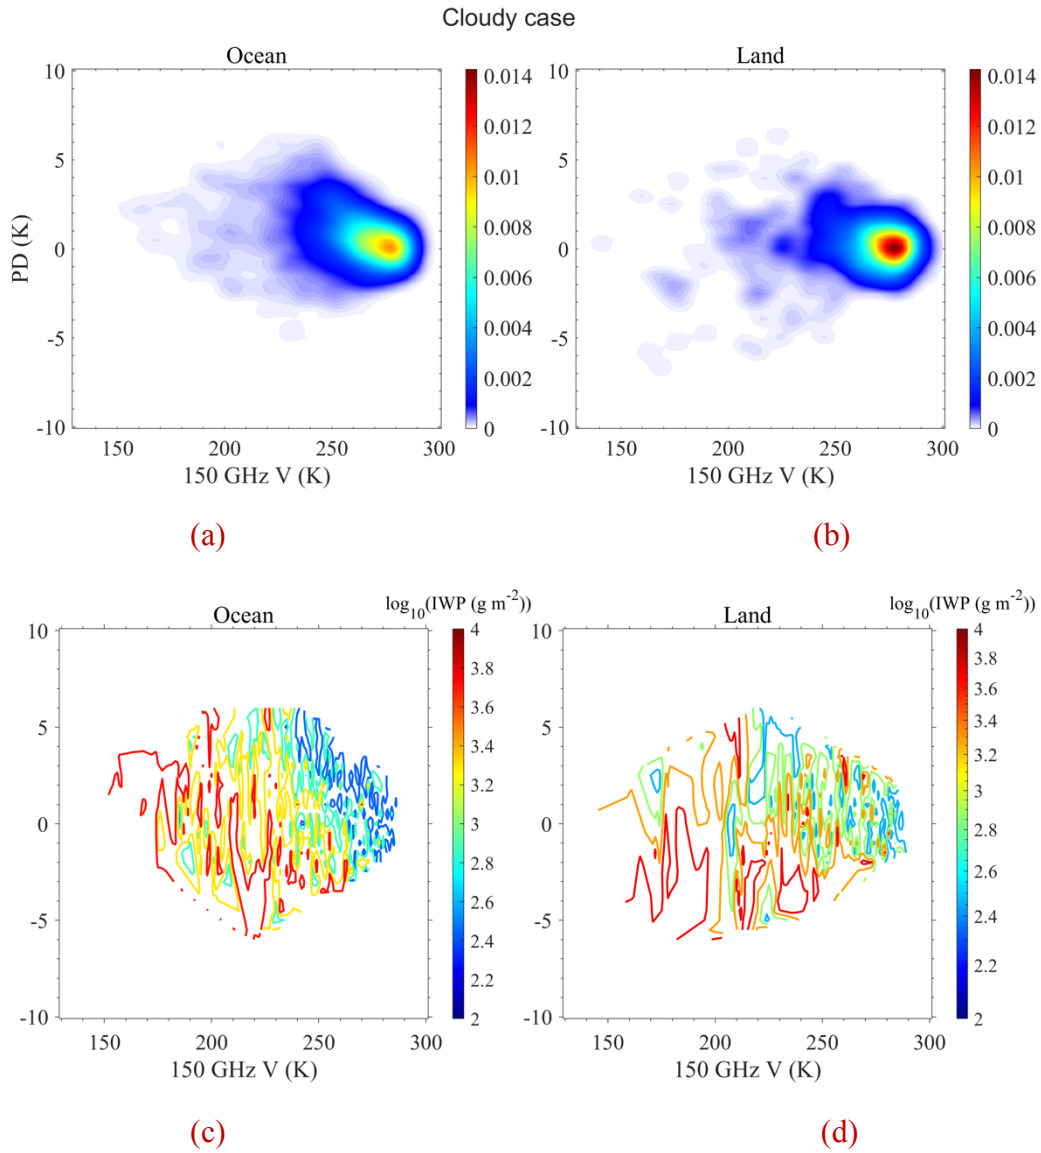

Figure 4. The PD–TB<sub>150V</sub> density plots for the collocations in the cloudy scenes over the ocean (a) and land (b). The (c) and (d) show the corresponding IWP from 2C-ICE.

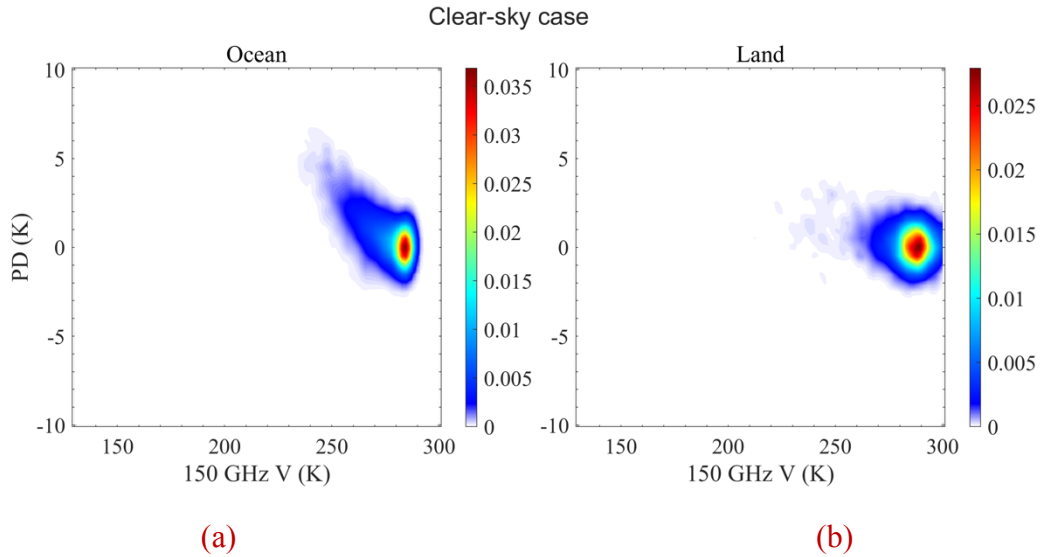

Figure 5. Same as Fig. 4 but for clear-sky scenes.”

Finally, the reliability of this study was verified using the annual mean IWP map and latitudinal mean plot compared with MODIS, 2C-ICE and ERA5.

(Sec. 4.3.2) “Figure 11 shows the global mean IWP for 2015 from Aqua/MODIS L3 product (MYD08\_M3, C61, Platnick et al., 2017), CloudSat 2C-ICE, FY-3B/MWHS retrieval and ERA5 reanalysis data set. ERA5 IWP data shown here is combined of its total column snow water (CSW) and cloud ice water (CIW) data since it differentiates between precipitating and non-precipitating ice. The overall distribution of the annual mean IWP for the four data sets is similar. The MODIS product has a significantly higher IWP than the other three products, while the ERA5 has a lower IWP overall. IWP from 2C-ICE is the same as MODIS near the equator and between ERA5 and MODIS elsewhere. Since 2C-ICE is used to train the networks, MWHS IWP is certainly approaching the 2C-ICE. The zonal means of IWP for 2015 are given in Fig. 12. The overall shape of the IWP zonal averages is fairly consistent across data sets. However, there are large differences in the overall magnitude of the IWP. These differences are particularly pronounced at mid-latitudes, especially between the MODIS product and the other three products. Compared to the IWP maps in Duncan and Eriksson (2018), this version of MODIS IWP is more similar to 2C-ICE near the equator (10°S - 10°N), but with increasing latitude, the IWP is much larger than the other products. The MWHS IWP is very close to that of 2C-ICE but lower than 2C-ICE in the mid-latitudes of the southern hemisphere. This may be due to the lack of training data in the middle and high latitudes of the southern hemisphere.



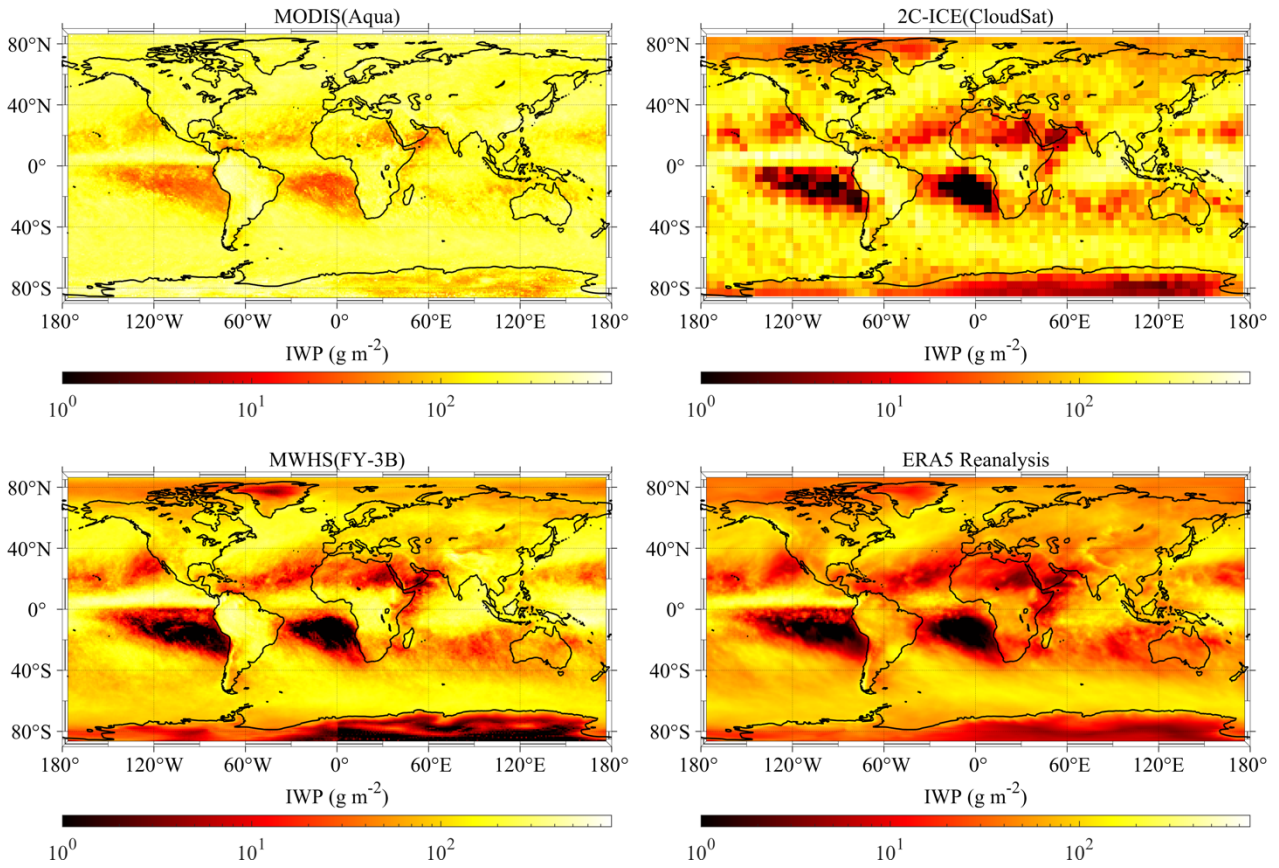

Figure 11. Global mean IWP maps for 2015 from MODIS, 2C-ICE, MWHS and ERA5. 2C-ICE is gridded on a 5° grid, while the other products are gridded on a 1° grid.

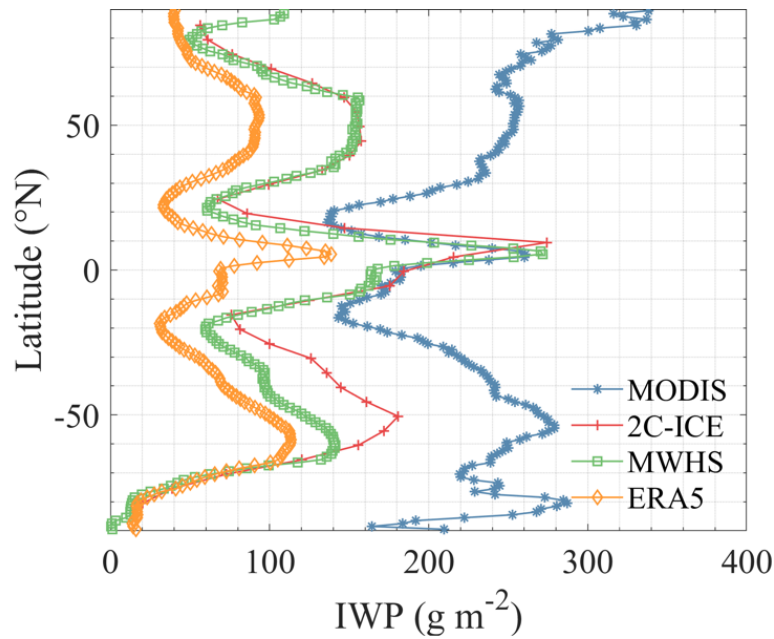

Figure 12. Zonal means of IWP for 2015.”

#### Section 4.2

Figures. 7 to 10 and table 2 show the statistics of the retrieval results using different inputs, and they are the primary results of this paper. However, the results become unpersuasive since the collocation database is not established, validated, and evaluated properly. Lines 270-273 give the estimations of the retrieval errors by



combining the 2C-ICE product errors and the NN retrieval errors, but the errors from the collocation finding procedure are not considered. The testing dataset is obtained in the same way as the training dataset, which means the two datasets share the same inherent collocation errors. Besides, no descriptions and explanations of fig.10 are given, and more discussions should be added in the revision.

Reply: Thanks for the comment. The issue of collocations has been discussed above. Additional evaluation metrics have been added here based on the suggestion from reviewer 1. We have added the table and analysed the full retrieval results. The performance over land and ocean is also discussed. The changes are as follows:

(Sec. 4.2) “The results show that all channels have cloud information, and CH. 4 (183-3 GHz) is the best for cloud detection. This channel is also used by the traditional method to distinguish cloudy from clear sky. However, the detection of ice clouds using MWHS channels is still limited. The FAR and POD of the best network are 0.26 and 0.63, respectively.” (Sec. 4.1)

Table 2. Errors of cloud filtering using different channels

|           | AC   | FAR  | POD  | F1   | CSI  |
|-----------|------|------|------|------|------|
| 1. CH.1-5 | 0.92 | 0.26 | 0.63 | 0.67 | 0.51 |
| 2. CH.2-5 | 0.92 | 0.27 | 0.61 | 0.66 | 0.49 |
| 3. CH.3-5 | 0.91 | 0.30 | 0.62 | 0.65 | 0.49 |
| 4. CH.4-5 | 0.91 | 0.29 | 0.59 | 0.64 | 0.48 |
| 5. CH.5   | 0.83 | 0.32 | 0.38 | 0.49 | 0.33 |

Table 3. Errors of IWP retrieval using different auxiliaries

|                 | RMSE (g m <sup>-2</sup> ) | MAPE (%) | BIAS (g m <sup>-2</sup> ) | CC   |
|-----------------|---------------------------|----------|---------------------------|------|
| 1. No           | 1085.75                   | 109.94   | -91.09                    | 0.50 |
| 2. Lat          | 943.68                    | 84.53    | -125.98                   | 0.61 |
| 3. Ang          | 1020.52                   | 106.43   | -93.64                    | 0.53 |
| 4. Mask         | 943.80                    | 81.84    | -126.03                   | 0.62 |
| 5. Lat+Ang      | 908.59                    | 79.88    | -145.70                   | 0.64 |
| 6. Lat+Mask     | 908.48                    | 75.80    | -141.02                   | 0.64 |
| 7. Ang+Mask     | 895.98                    | 78.60    | -143.64                   | 0.65 |
| 8. Lat+Ang+Mask | 875.20                    | 75.30    | -117.05                   | 0.67 |

Table 4. Errors of IWP retrieval using different channels

|              | RMSE ( $\text{g m}^{-2}$ ) | MAPE (%) | BIAS ( $\text{g m}^{-2}$ ) | CC   |
|--------------|----------------------------|----------|----------------------------|------|
| 1. CH.1-5    | 875.20                     | 75.30    | -117.05                    | 0.67 |
| 2. CH.2-5    | 901.84                     | 76.75    | -139.49                    | 0.64 |
| 3. CH.3-5    | 932.29                     | 79.34    | -158.89                    | 0.61 |
| 4. CH.3-5+PD | 894.08                     | 79.82    | -134.88                    | 0.65 |

The final retrieval models (case 1 in Table 2 and case 8 in Table 3) were selected according to the metrics. Combining the cloud filtering network and the IWP retrieval network with the test data, the final results are shown in Table 5. The performance over the ocean and land is also listed. After adding the cloud filtering network, the accuracy of IWP retrieval decreased, significantly for MAPE and BIAS, and slightly for CC and RMSE. The results are better over the ocean than over land, especially the correlation. Figure 8 shows the scatter plot between MWHS IWP and 2C-ICE IWP in January 2015. The result shows relative agreement, but MWHS IWP has significant dispersion at low IWP, which may be due to the lack of sensitivity of MWHS to thin ice clouds. The final model underestimates the true value overall but overestimates it when the IWP  $< 300 \text{ g m}^{-2}$ .

Table 5. Errors of the final selected models

|             | RMSE ( $\text{g m}^{-2}$ ) | MAPE (%) | BIAS ( $\text{g m}^{-2}$ ) | CC   |
|-------------|----------------------------|----------|----------------------------|------|
| Final model | 916.76                     | 92.90    | -213.12                    | 0.65 |
| Land        | 942.81                     | 92.56    | -260.47                    | 0.55 |
| Ocean       | 908.20                     | 92.76    | -196.79                    | 0.69 |

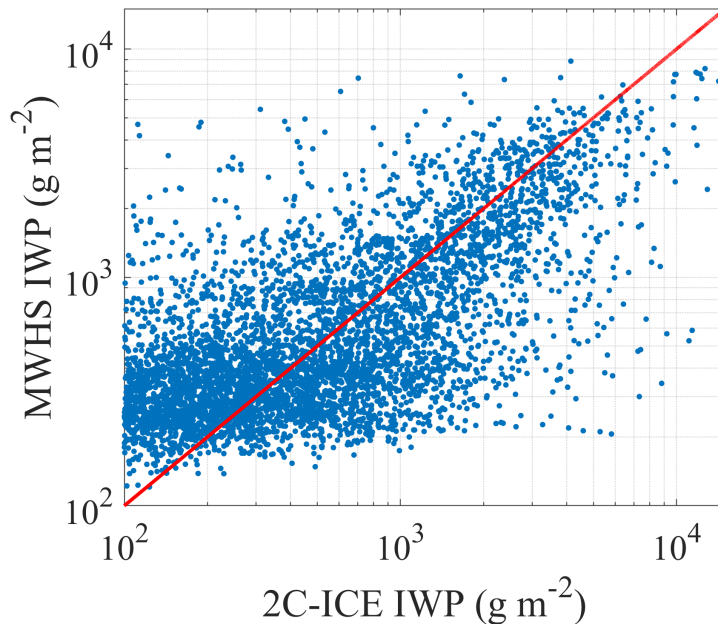

Figure 8. Comparison between 2C-ICE and MWHS IWP. The red line represents the diagonal 1:1 line. Clear-sky scenes are not shown.”

#### Section 4.3.1

*Figures 11 to 14 show a case study to retrieve IWP of the typhoon Rammasun using MWHS measurements. Again, validations of the retrieval results are completely missing. The statements say that “the structure and the distribution of IWP are consistent with the characteristic of TB (line 324)” and therefore “the performance of the two neural networks appears to be good (line 328)”, which are very crude. Besides, the atmospheric and cloud microphysical statistics in typhoon are likely to be very dissimilar to the globally averaged microphysics in the collocation database. Using a different training dataset with more accurate prior information should make the typhoon retrievals better. Also, the plots of BT measurements in figures 11 -13 occupy too much space. You should provide more analytical results instead of merely showing the instrument observations.*

Reply: Thanks for the good suggestion. We believe that the results would certainly be better if a dedicated typhoon data set is used. A tropical cyclone Bansi observed by MWHS and CloudSat simultaneously is found on January 12, 2015 with the collocation time of about 3 minutes. It is used to validate the performance of the network in tropical cyclone case. The plots of BT measurements have been removed. The modifications are as follows:

(Sec. 4.3.1) “A tropical cyclone Bansi observed by MWHS and CloudSat simultaneously (the time difference is about 3 minutes) on 12 January 2015 is selected for the validation of the final networks. MWHS observed TBs of the cyclone are manifested in Fig. 9. Quite low TB (as low as 150 K) can be found at 150 GHz and 183-7 GHz channels in the regions of the eyewall (the eye is not seen) and spiral rain bands which are mainly caused by the scattering of ice particles in the clouds. The 183-1 GHz and 183-3 GHz channels are strongly influenced by water vapor, the shape of the cyclone is not observable, but clear low TBs can still be seen in the eyewall and rainband. The PDs at 150 GHz ( $TB_V - TB_H$ ), their distribution characteristics are the same as the low TBs. The PD reaches its maximum in the anvil precipitation regions (around 5 K, consistent with the result in Fig. 4) and decrease in the remote clear-sky or cirrus regions.

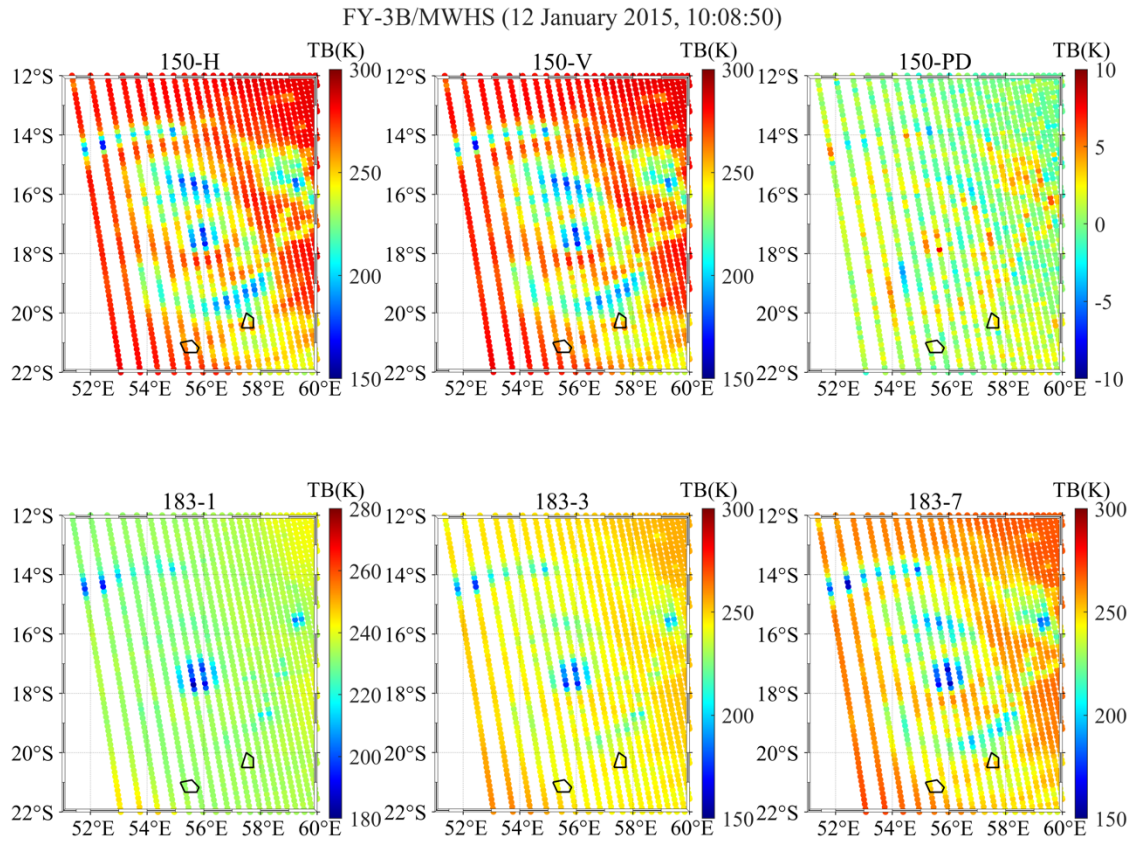

Figure 9. Tropical cyclone Bansi on 12 January 2015 as observed with FY-3B/MWHS channels.

Applying the two neural networks trained above to the tropical cyclone, the retrieval IWP<sub>s</sub> are shown in Fig. 10 in comparison with 2C-ICE, and the retrieval errors are listed in Table 6. Due to the narrow field of view of CloudSat, a total of 21 pixels of MWHS are collocated in the tropical cyclone region. The results show that MWHS IWP has a high correlation with 2C-ICE, the MAPE and BIAS are better than that in Table 5, although the RMSE is larger, it is reasonable in tropical cyclones.

Table 6. Errors of the tropical cyclone retrieval

|       | RMSE ( $\text{g m}^{-2}$ ) | MAPE (%) | BIAS ( $\text{g m}^{-2}$ ) | CC   |
|-------|----------------------------|----------|----------------------------|------|
| Bansi | 1191.3                     | 77.69    | 82.07                      | 0.73 |

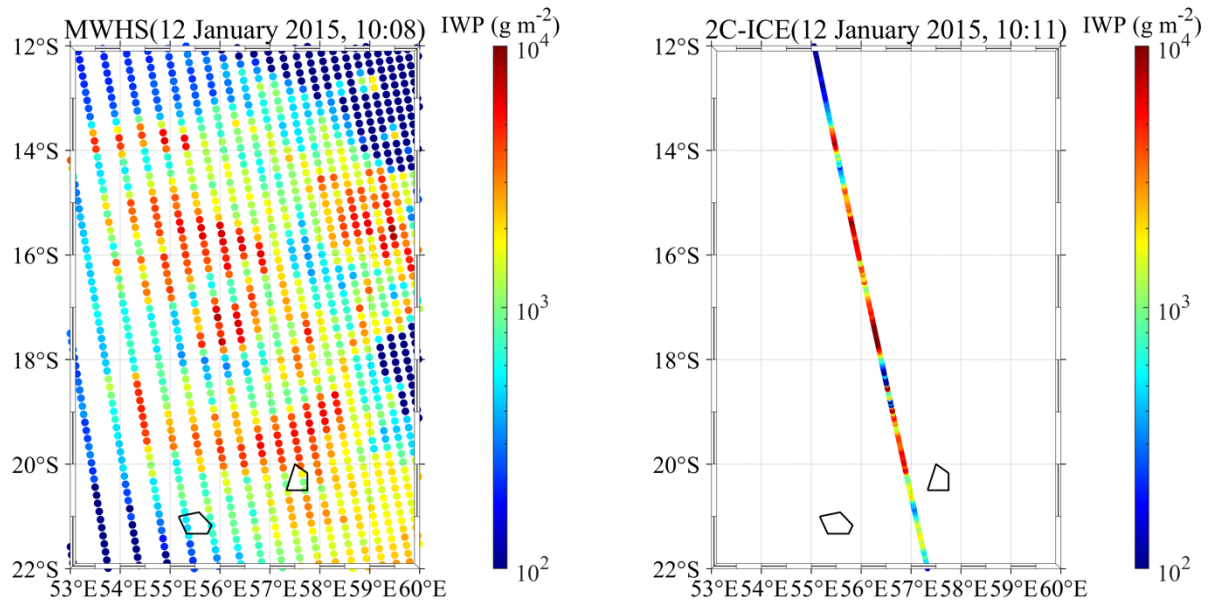

Figure 10. IWP comparison of MWHS and 2C-ICE at the tropical cyclone Bansi.”

*At last, there are many grammatical errors, and an English revision is necessary to improve the manuscript.*

Reply: Thanks for the comment. We have rechecked the grammar. However, due to lack of time, English revision will be performed by professional editor later.
